# Supplementary material
Source: Springer Nature journal article supplement (https://www.springermedizin.de/resource/supplementary/12936_2006_381_MOESM8_ESM.pdf/9547682)

### Early Instars

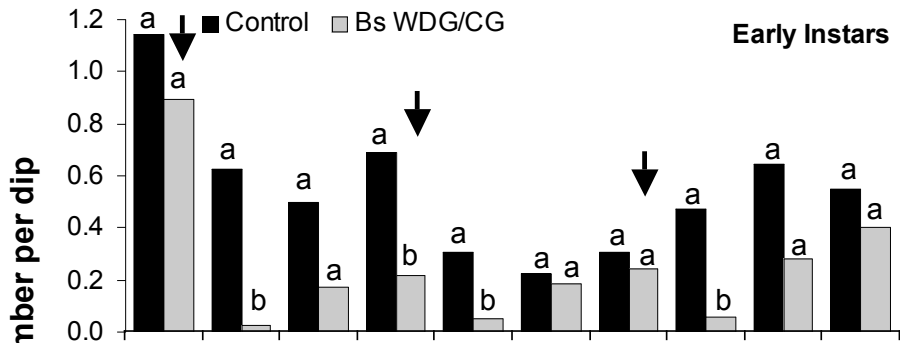

### Late Instars

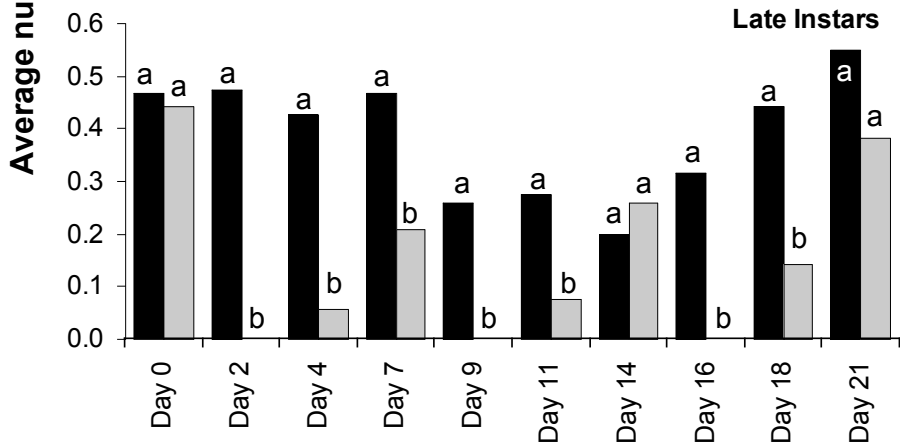

Supplement: MOESM8 [file 9547682]
